# Supplementary material
Source: PubMed Central journal article supplement (PMC4918443)
Supplement: ismej2015236x9.pdf [file ismej2015236x9.pdf]

|                                                                                   |           | 22L | 12L | PRL2010 | ATCCI5697 | m.a. |
|-----------------------------------------------------------------------------------|-----------|-----|-----|---------|-----------|------|
| Putative arabinose/maltose/lactose ABC transporter                                | BADO_1628 |     |     |         |           |      |
|                                                                                   | BADO_1627 |     |     |         |           |      |
|                                                                                   | BADO_1626 |     |     |         |           |      |
| Putative maltose/trehalose ABC transporter                                        | BADO_1723 |     |     |         |           |      |
|                                                                                   | BADO_1722 |     |     |         |           |      |
|                                                                                   | BADO_1721 |     |     |         |           |      |
| Universal ATPase for sugar-specific ABC transporters                              | BADO_1699 |     |     |         |           |      |
| Undefined ABC transporter                                                         | BADO_1693 |     |     |         |           |      |
|                                                                                   | BADO_1692 |     |     |         |           |      |
| Maltose ABC transporter                                                           | BADO_1442 |     |     |         |           |      |
|                                                                                   | BADO_1440 |     |     |         |           |      |
|                                                                                   | BADO_1443 |     |     |         |           |      |
| Maltose/maltotriose/maltodextrin ABC transporter                                  | BADO_1448 |     |     |         |           |      |
|                                                                                   | BADO_1449 |     |     |         |           |      |
|                                                                                   | BADO_1450 |     |     |         |           |      |
| D-glucose:H+ symporter MFS transporter                                            | BADO_1479 |     |     |         |           |      |
| Solute Binding Protein arabinose/lactose/maltose ABC transporter                  | BADO_0493 |     |     |         |           |      |
| oligogalacturonide transporter ABC transporter                                    | BADO_0443 |     |     |         |           |      |
|                                                                                   | BADO_0442 |     |     |         |           |      |
| Putative arabinose efflux MFS transporter                                         | BADO_0381 |     |     |         |           |      |
| $\beta$ -glucoside (methyl- $\beta$ -glucoside, salicin, arbutin) PTS transporter | BADO_0372 |     |     |         |           |      |
| Maltose/maltotriose/maltodextrin ABC transporter                                  | B12L_0109 |     |     |         |           |      |
|                                                                                   | B12L_0110 |     |     |         |           |      |
|                                                                                   | B12L_0111 |     |     |         |           |      |
| Putative solute Binding Protein arabinose ABC transporter                         | B12L_0356 |     |     |         |           |      |
| Putative arabinose/maltose/lactose ABC transporter                                | B12L_1326 |     |     |         |           |      |
|                                                                                   | B12L_1327 |     |     |         |           |      |
|                                                                                   | B12L_1328 |     |     |         |           |      |
|                                                                                   | B12L_1329 |     |     |         |           |      |
| Putative substrate binding arabinose/maltose/lactose ABC transporter              | B12L_1482 |     |     |         |           |      |
| Putative arabinose efflux MFS transporter                                         | B12L_1505 |     |     |         |           |      |
| Arabinitol or Ribitol:H+ MFS symporter                                            | B12L_1579 |     |     |         |           |      |
| Maltose ABC transporter                                                           | B12L_1780 |     |     |         |           |      |
|                                                                                   | B12L_1781 |     |     |         |           |      |
|                                                                                   | B12L_1783 |     |     |         |           |      |
| Multiple sugars ABC transporter                                                   | B12L_1803 |     |     |         |           |      |
|                                                                                   | B12L_1804 |     |     |         |           |      |
|                                                                                   | B12L_1805 |     |     |         |           |      |
| Universal ATPase for sugar-specific ABC transporters                              | B12L_1833 |     |     |         |           |      |
| Glucose PTS transporter                                                           | BBPR_0239 |     |     |         |           |      |
| N-Acetyl glucosamine (NAG) PTS transporter                                        | BBPR_0240 |     |     |         |           |      |
| Putative arabinose/maltose/lactose ABC transporter                                | BBPR_1056 |     |     |         |           |      |
|                                                                                   | BBPR_1057 |     |     |         |           |      |
|                                                                                   | BBPR_1058 |     |     |         |           |      |
| Undefined ABC transporter                                                         | BBPR_1353 |     |     |         |           |      |
|                                                                                   | BBPR_1356 |     |     |         |           |      |
|                                                                                   | BBPR_1358 |     |     |         |           |      |
| Putative arabinose efflux MFS transporter                                         | BBPR_1490 |     |     |         |           |      |
| $\beta$ -glucoside (methyl- $\beta$ -glucoside, salicin, arbutin) PTS transporter | BBPR_1508 |     |     |         |           |      |
| N-, N'-diacetylchitobiose/cellobiose PTS transporter                              | BBPR_1715 |     |     |         |           |      |
|                                                                                   | BBPR_1716 |     |     |         |           |      |
|                                                                                   | BBPR_1717 |     |     |         |           |      |
| Universal ATPase for sugar-specific ABC transporters                              | BBPR_1824 |     |     |         |           |      |
| Undefined ABC transporter                                                         | Blon_0375 |     |     |         |           |      |
|                                                                                   | Blon_0376 |     |     |         |           |      |
|                                                                                   | Blon_0377 |     |     |         |           |      |
| L-arabinose:proton MFS symporter                                                  | Blon_0431 |     |     |         |           |      |
| Putative Trehalose/N,N'-diacetylchitobiose ABC permease                           | Blon_0460 |     |     |         |           |      |
| Alginate/aldouronate ABC transporter                                              | Blon_2059 |     |     |         |           |      |
|                                                                                   | Blon_2060 |     |     |         |           |      |
|                                                                                   | Blon_2061 |     |     |         |           |      |
| Putative arabinose/maltose/lactose ABC transporter                                | Blon_2175 |     |     |         |           |      |
|                                                                                   | Blon_2176 |     |     |         |           |      |
|                                                                                   | Blon_2177 |     |     |         |           |      |
| L-Fucose:H+ symporter or glucose/galactose MFS transporter                        | Blon_2307 |     |     |         |           |      |
| Alginate ABC transporter                                                          | Blon_2342 |     |     |         |           |      |
|                                                                                   | Blon_2343 |     |     |         |           |      |
|                                                                                   | Blon_2344 |     |     |         |           |      |
|                                                                                   | Blon_2347 |     |     |         |           |      |
|                                                                                   | Blon_2350 |     |     |         |           |      |
|                                                                                   | Blon_2351 |     |     |         |           |      |
|                                                                                   | Blon_2352 |     |     |         |           |      |
| Putative arabinose/maltose/lactose ABC transporter                                | Blon_2354 |     |     |         |           |      |
|                                                                                   | Blon_2357 |     |     |         |           |      |
|                                                                                   | Blon_2359 |     |     |         |           |      |
|                                                                                   | Blon_2360 |     |     |         |           |      |
| Putative sn-glycerol-3-phosphate ABC transporter                                  | Blon_2361 |     |     |         |           |      |
|                                                                                   | Blon_2367 |     |     |         |           |      |
|                                                                                   | Blon_2368 |     |     |         |           |      |
| Putative chitobiose/FOS ABC transporter                                           | Blon_2369 |     |     |         |           |      |
|                                                                                   | Blon_2378 |     |     |         |           |      |
|                                                                                   | Blon_2379 |     |     |         |           |      |
| Multiple sugars ABC transporter                                                   | Blon_2380 |     |     |         |           |      |
|                                                                                   | Blon_2413 |     |     |         |           |      |
|                                                                                   | Blon_2414 |     |     |         |           |      |
| Maltose ABC transporter                                                           | Blon_2441 |     |     |         |           |      |
|                                                                                   | Blon_2442 |     |     |         |           |      |
|                                                                                   | Blon_2444 |     |     |         |           |      |
| raffinose/stachyose ABC transporter                                               | Blon_2445 |     |     |         |           |      |
|                                                                                   | Blon_2456 |     |     |         |           |      |
|                                                                                   | Blon_2457 |     |     |         |           |      |
| Glucose PTS transporter                                                           | Blon_2458 |     |     |         |           |      |
| N-Acetyl glucosamine (NAG) PTS transporter                                        | Blon_2470 |     |     |         |           |      |
| Universal ATPase for sugar-specific ABC transporters                              | Blon_2471 |     |     |         |           |      |
|                                                                                   | Blon_2475 |     |     |         |           |      |

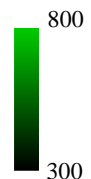

Figure S4
