# Supplementary material
Source: PubMed Central journal article supplement (PMC4918443)
Supplement: ismej2015236x13.pdf [file ismej2015236x13.pdf]

a)

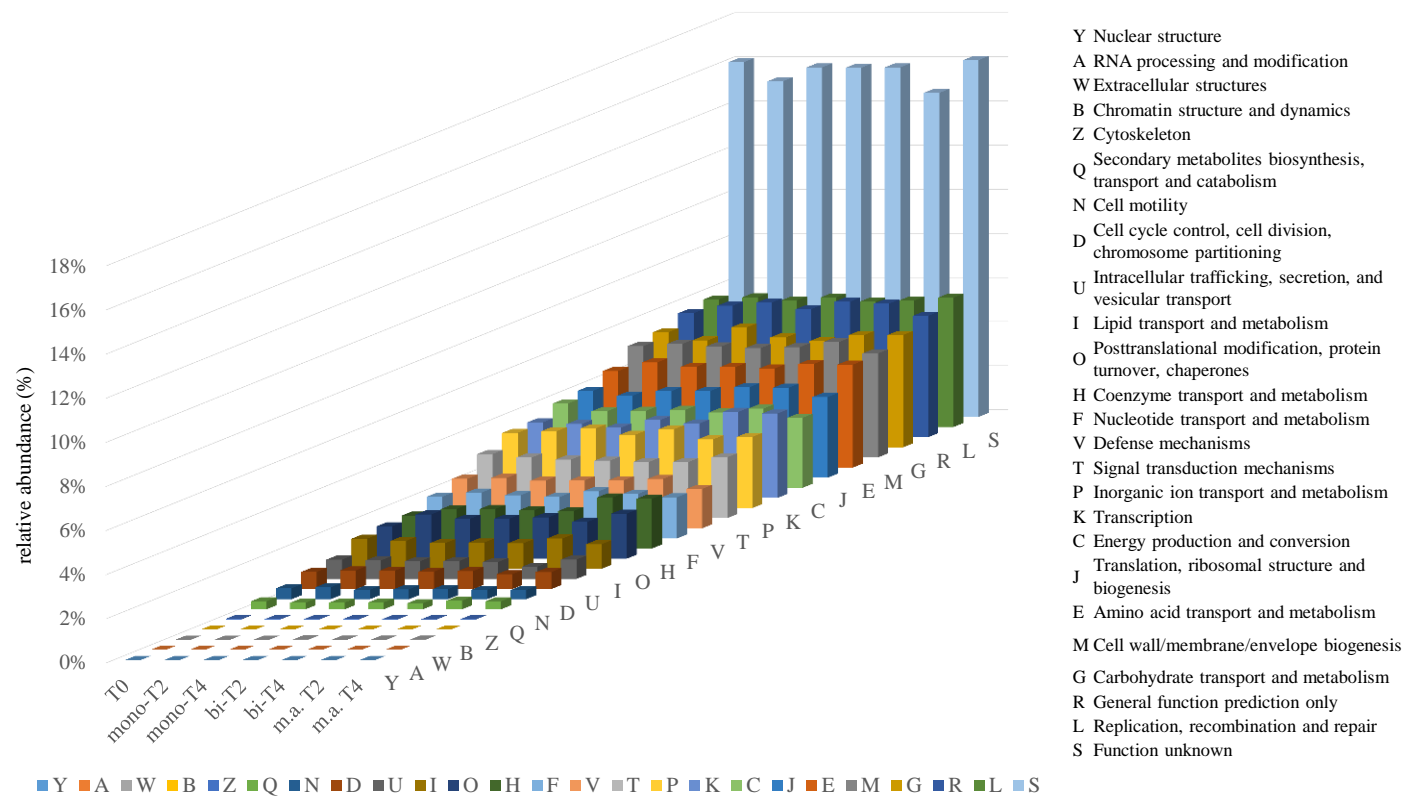

b)

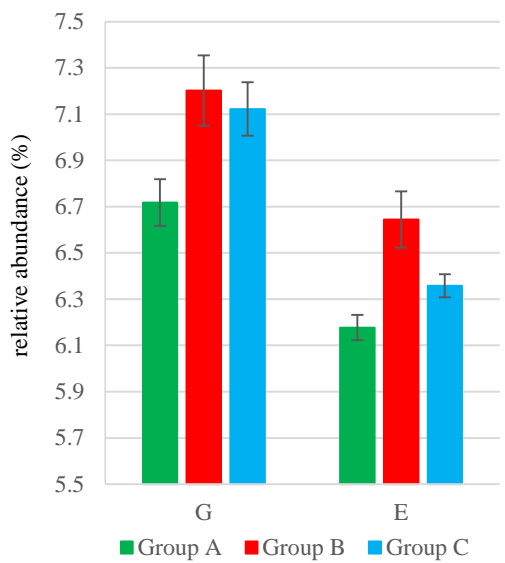

G Carbohydrate transport and metabolism  
 E Amino acid transport and metabolism

c)

|       | Mono-association |        | Bi-association |         | Multiple-association |        |
|-------|------------------|--------|----------------|---------|----------------------|--------|
|       | T0-T2            | T0-T4  | T0-T2          | T0-T4   | T0-T2                | T0-T4  |
| GH6   | 198,6%           | 153,5% | 143,9%         | 144,6%  | 41,2%                | 124,4% |
| GH8   | -14,6%           | 23,6%  | 78,1%          | 21,5%   | 47,1%                | -6,1%  |
| GH11  | 805,0%           | 731,8% | 474,9%         | 1407,5% | 1681,9%              | 168,3% |
| GH13  | 44,4%            | 42,6%  | 46,7%          | 25,8%   | 38,5%                | 37,9%  |
| GH15  | -15,5%           | -56,2% | -46,1%         | -41,5%  | 201,6%               | 103,9% |
| GH19  | 61,0%            | 67,4%  | 187,6%         | 828,1%  | 742,0%               | 183,6% |
| GH20  | 50,2%            | 26,8%  | 28,9%          | 19,2%   | -9,4%                | 128,6% |
| GH27  | 15,8%            | 12,4%  |                | 43,8%   | 54,9%                | 44,0%  |
| GH37  | 135,9%           | 97,9%  | 358,2%         | 371,6%  | 219,8%               | 7,3%   |
| GH38  | 79,8%            | 48,2%  | 57,3%          | 36,0%   | 153,7%               | 102,8% |
| GH39  | 71,5%            | 43,6%  | 29,4%          | 43,5%   | -28,7%               | 79,3%  |
| GH66  | 137,5%           | 239,2% | 133,2%         | 73,4%   | 148,0%               | 375,3% |
| GH70  | 214,6%           | 199,9% | 148,8%         | 135,9%  | 1065,1%              | 222,0% |
| GH81  | 445,2%           | 503,2% | 854,1%         | 734,9%  | 2184,5%              | 382,9% |
| GH84  | 46,8%            | 38,4%  | 15,8%          | 155,8%  | -31,5%               | -16,2% |
| GH87  | 81,8%            | 78,3%  | 13,2%          | 125,1%  | 65,0%                | 138,5% |
| GH92  | 10,5%            | 23,8%  | 7,1%           | 28,8%   | 60,8%                | 85,5%  |
| GH93  | 305,4%           | 319,9% | 226,2%         | 61,3%   | 242,7%               | 758,5% |
| GH109 | 12,9%            | 8,9%   | 74,1%          | 130,8%  | -32,9%               | 52,0%  |
| GH112 | -8,8%            | -6,3%  | 54,7%          | 10,9%   | -16,2%               | 5,5%   |
| GH120 | 181,9%           | 110,2% | 151,3%         | 143,8%  | 133,5%               | 72,9%  |
| GH127 | 100,7%           | 104,1% | 38,0%          | 327,0%  | 83,2%                | 50,9%  |

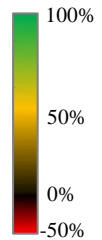

Figure S8
