# Supplementary material
Source: PubMed Central journal article supplement (PMC4918443)

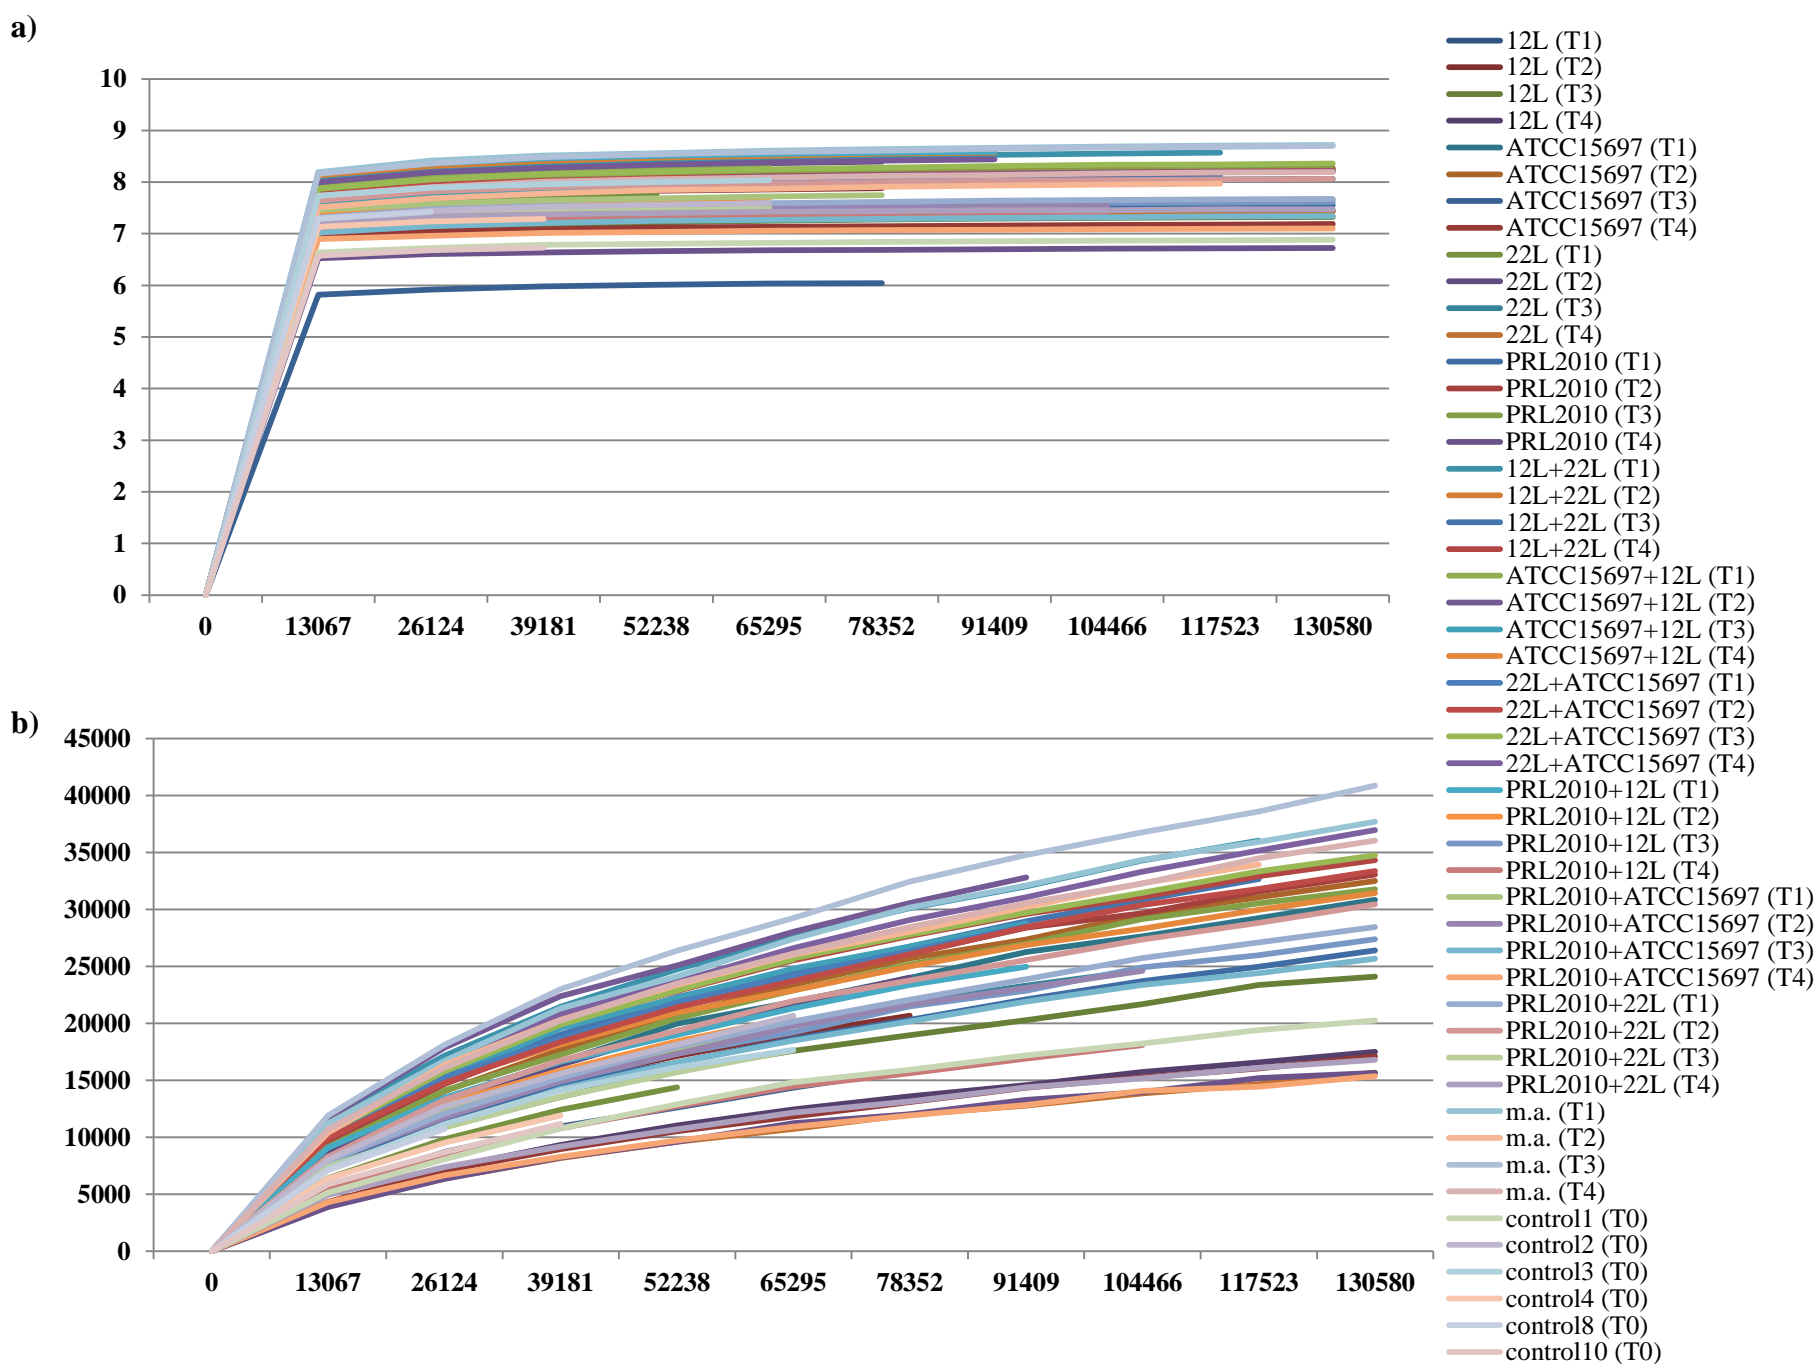

**Figure S5**

Supplement: ismej2015236x10.pdf [file ismej2015236x10.pdf]

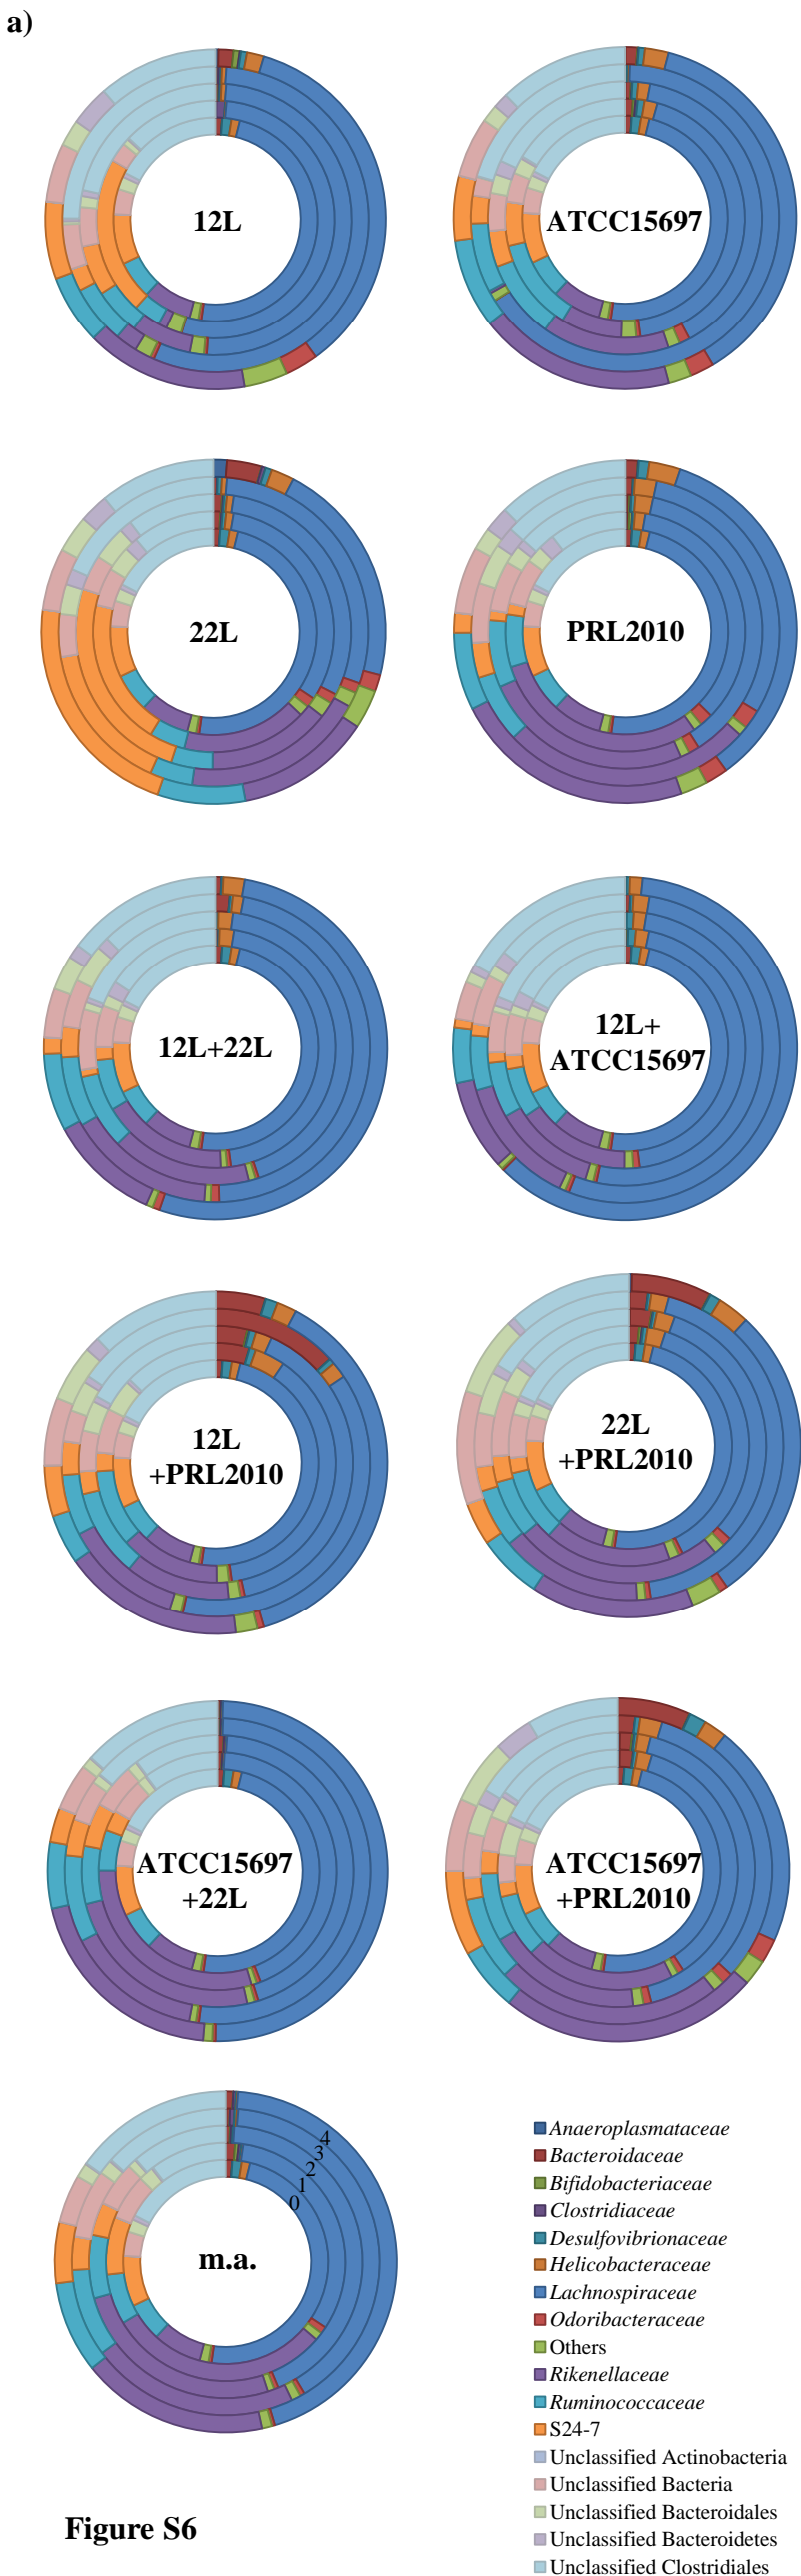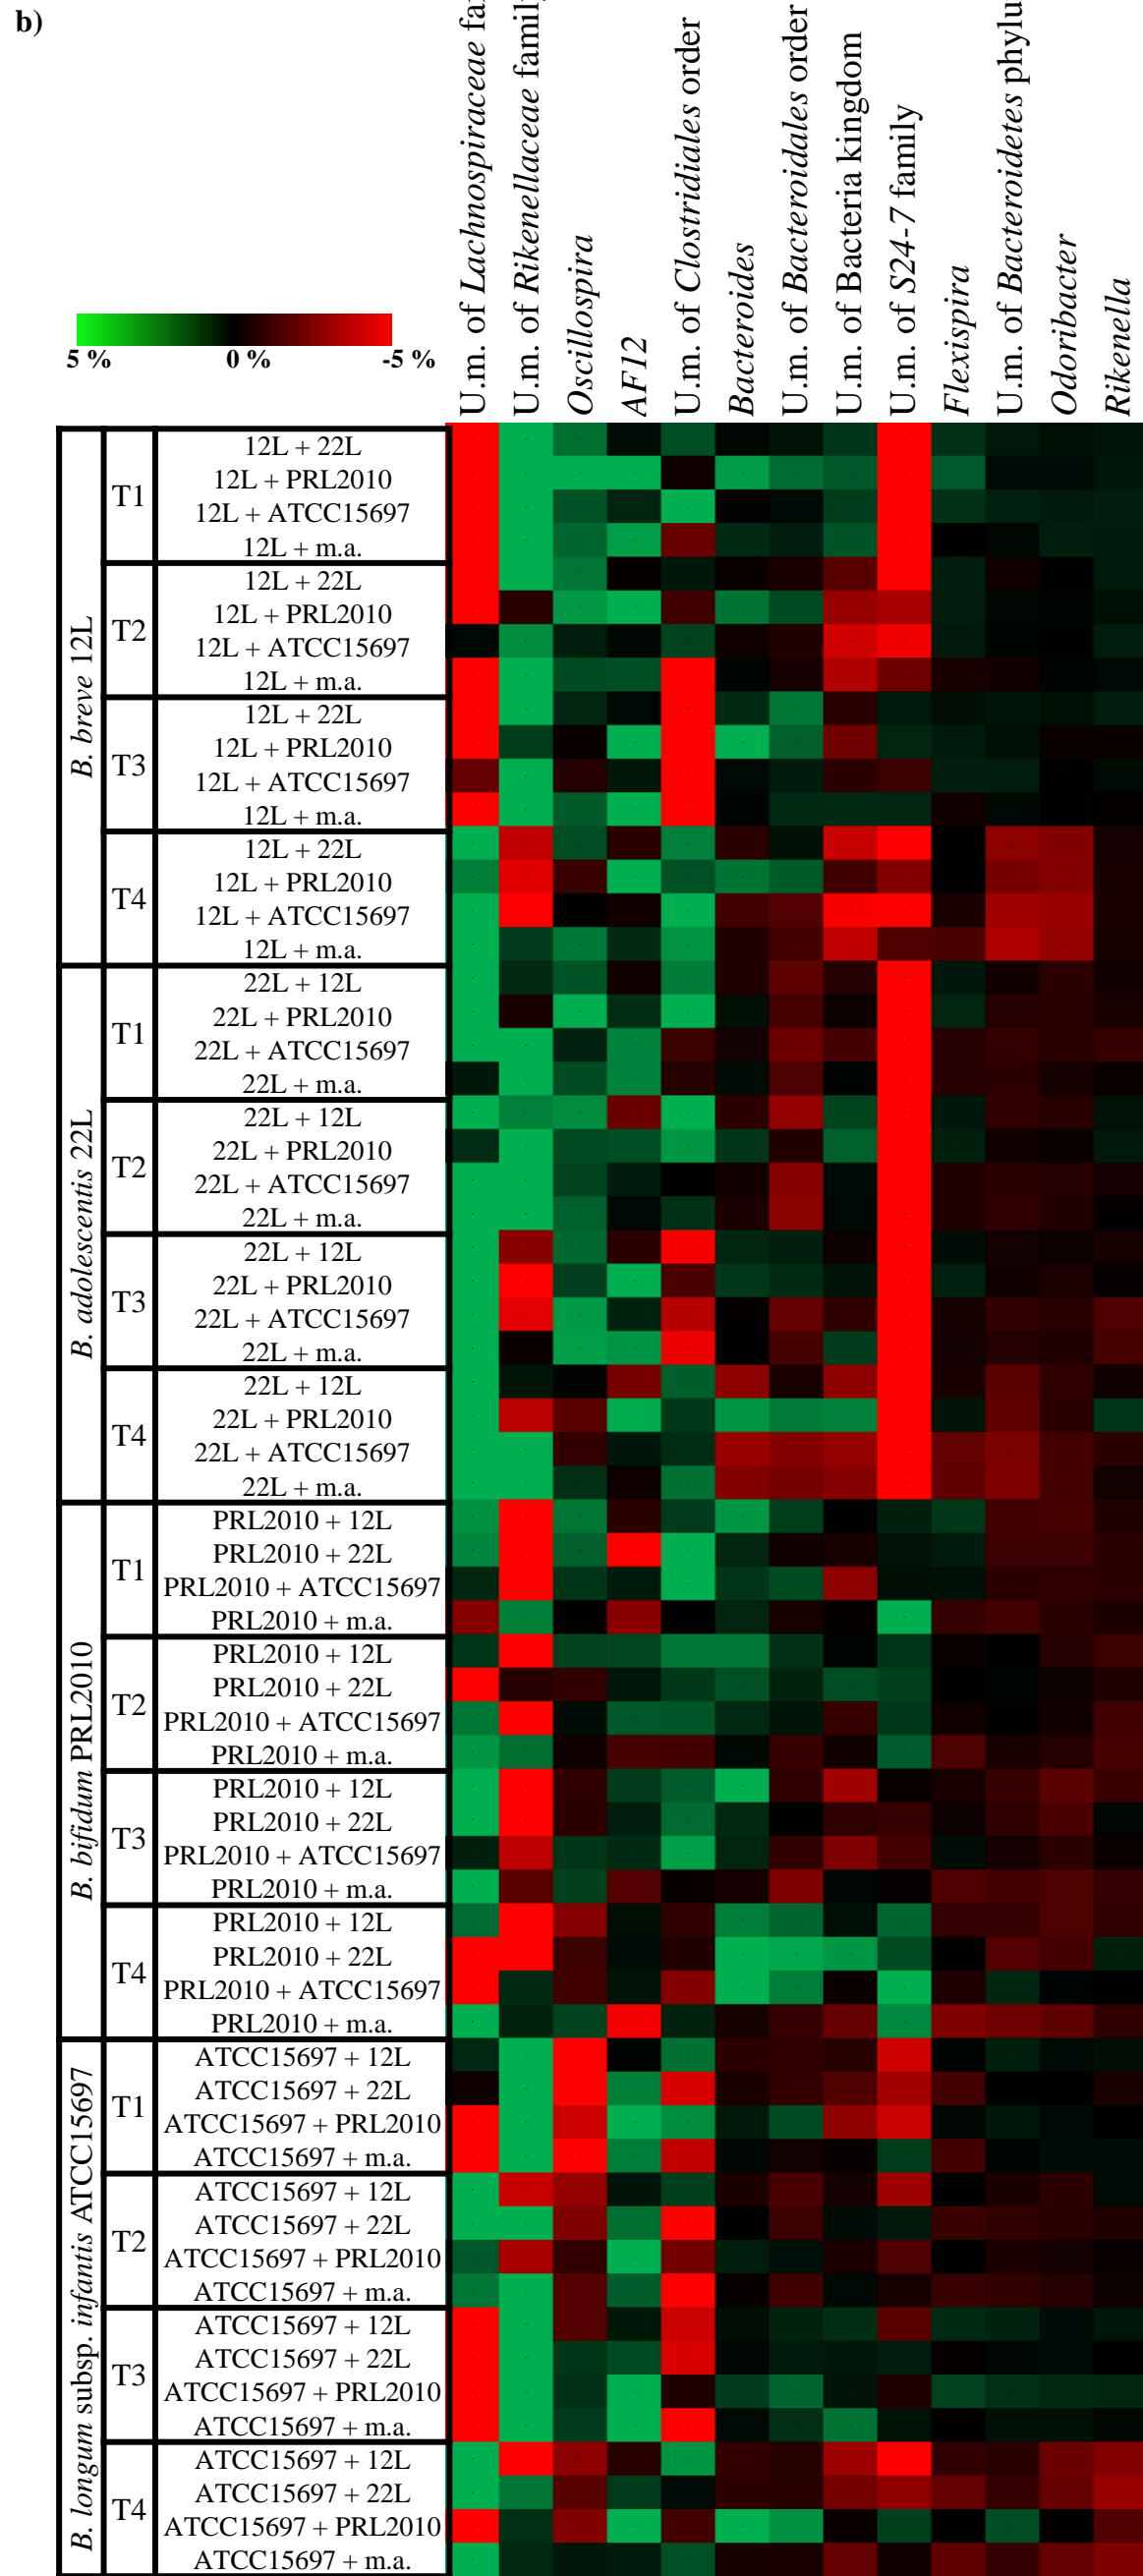

Figure S6

Supplement: ismej2015236x11.pdf [file ismej2015236x11.pdf]

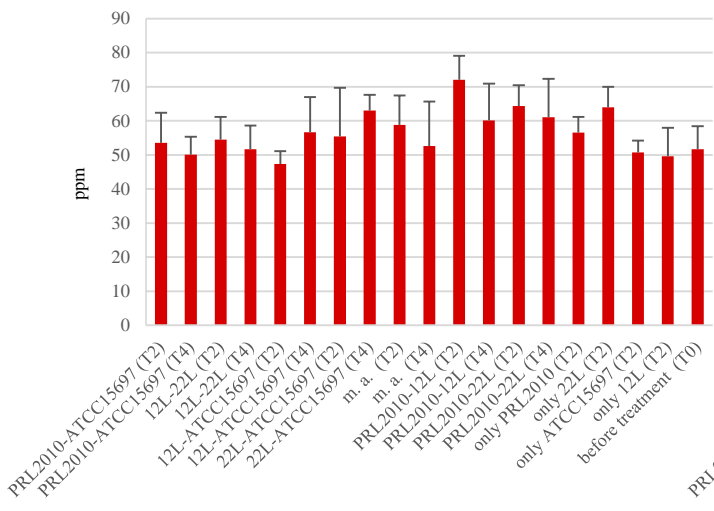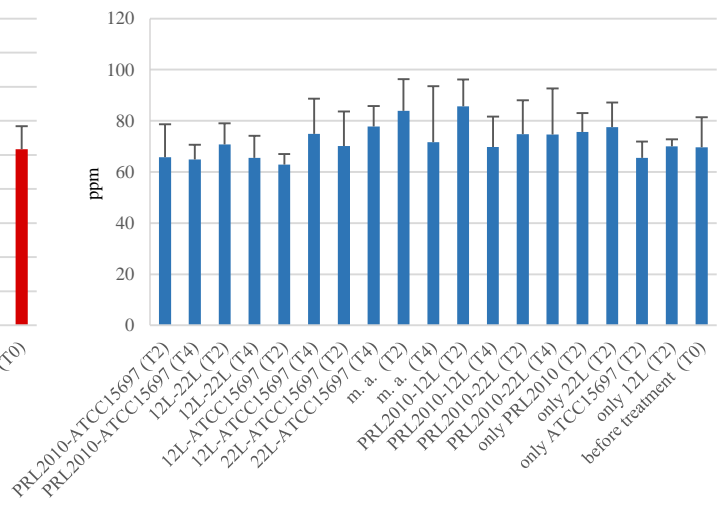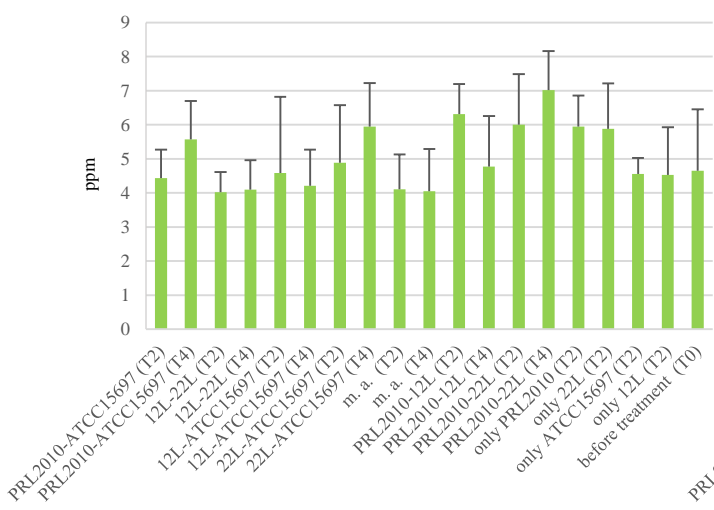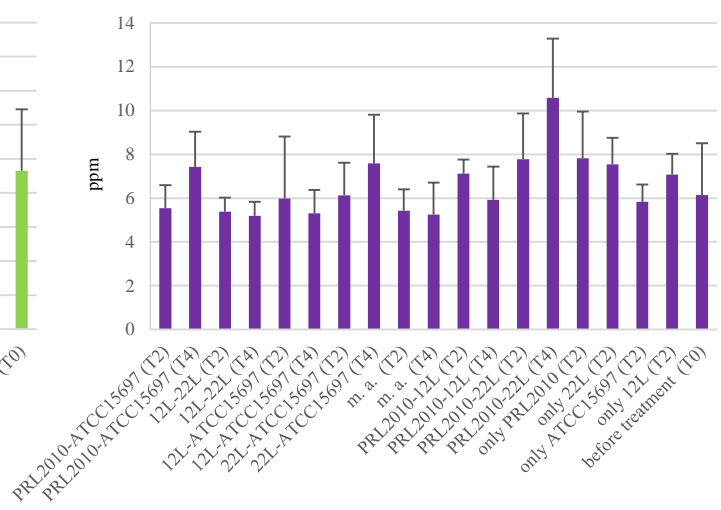

■ α-glucose     
 ■ β-glucose     
 ■ α-galactose     
 ■ β-galactose

**Figure S9**

Supplement: ismej2015236x14.pdf [file ismej2015236x14.pdf]

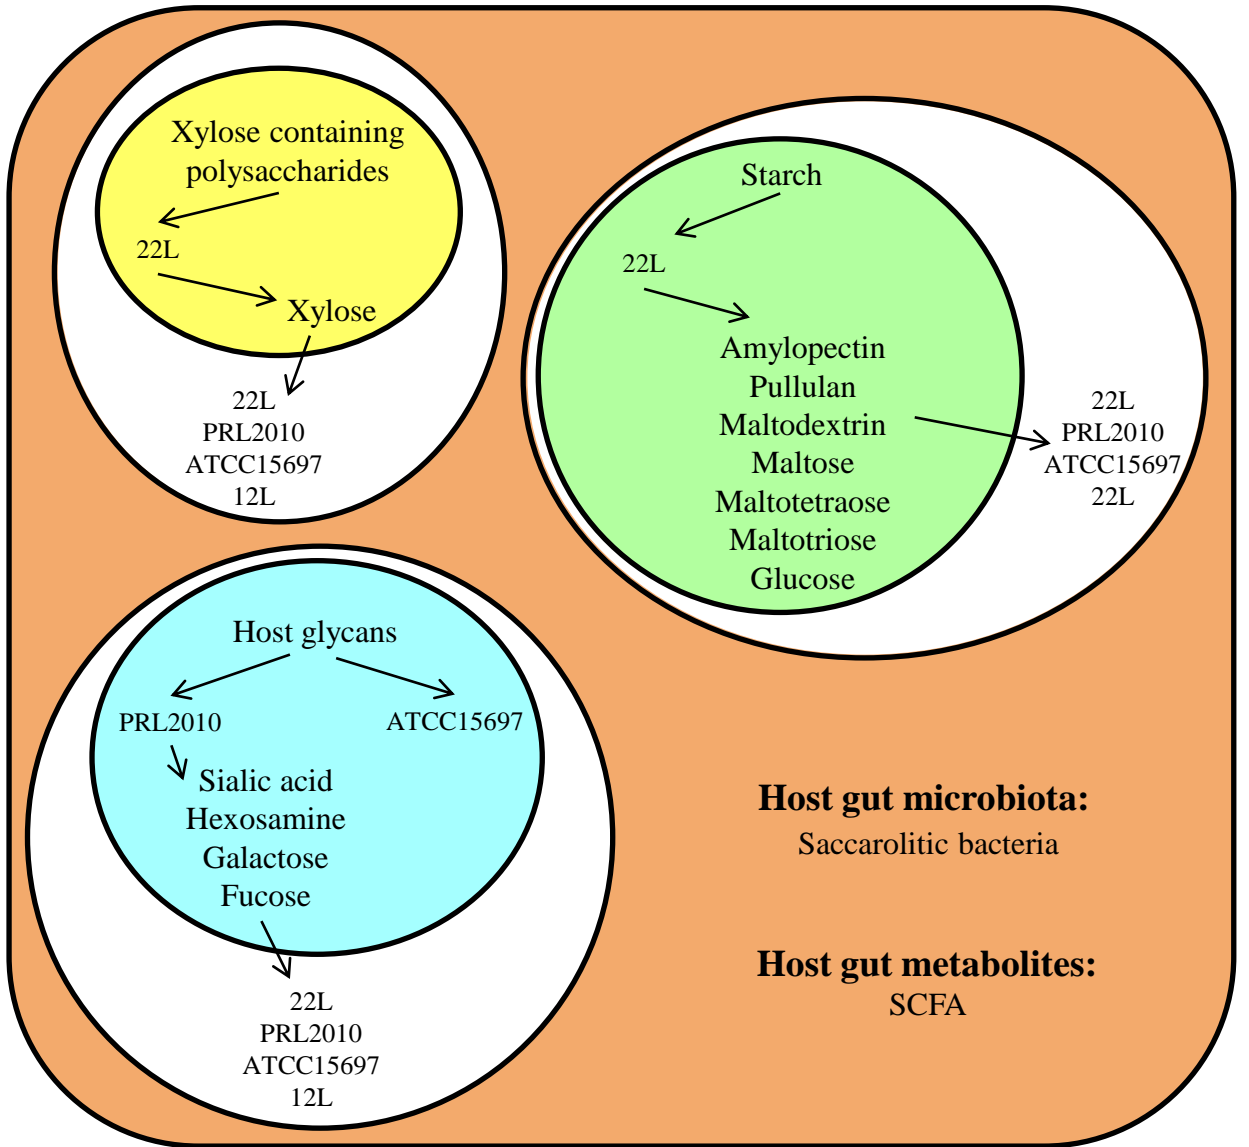

Figure S10

Supplement: ismej2015236x15.pdf [file ismej2015236x15.pdf]

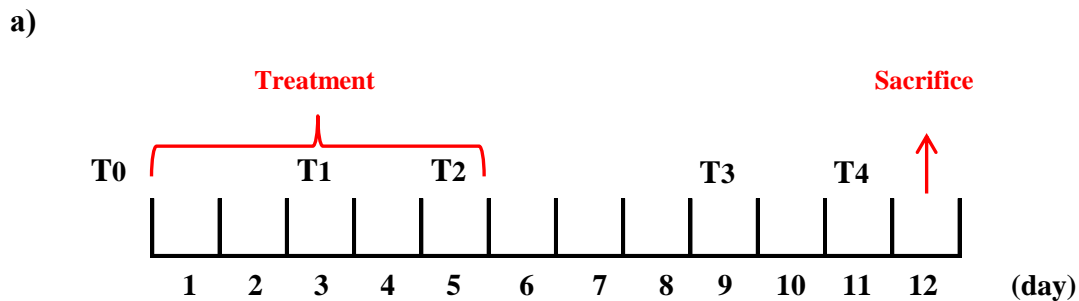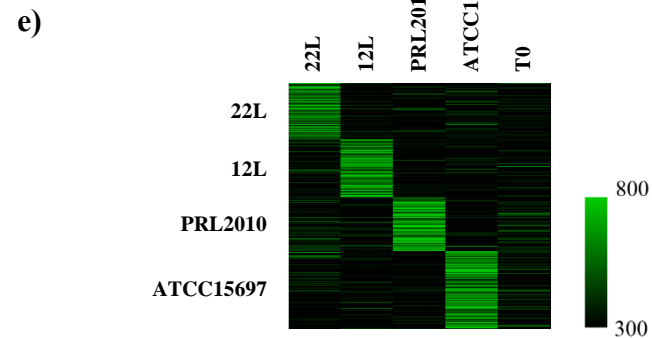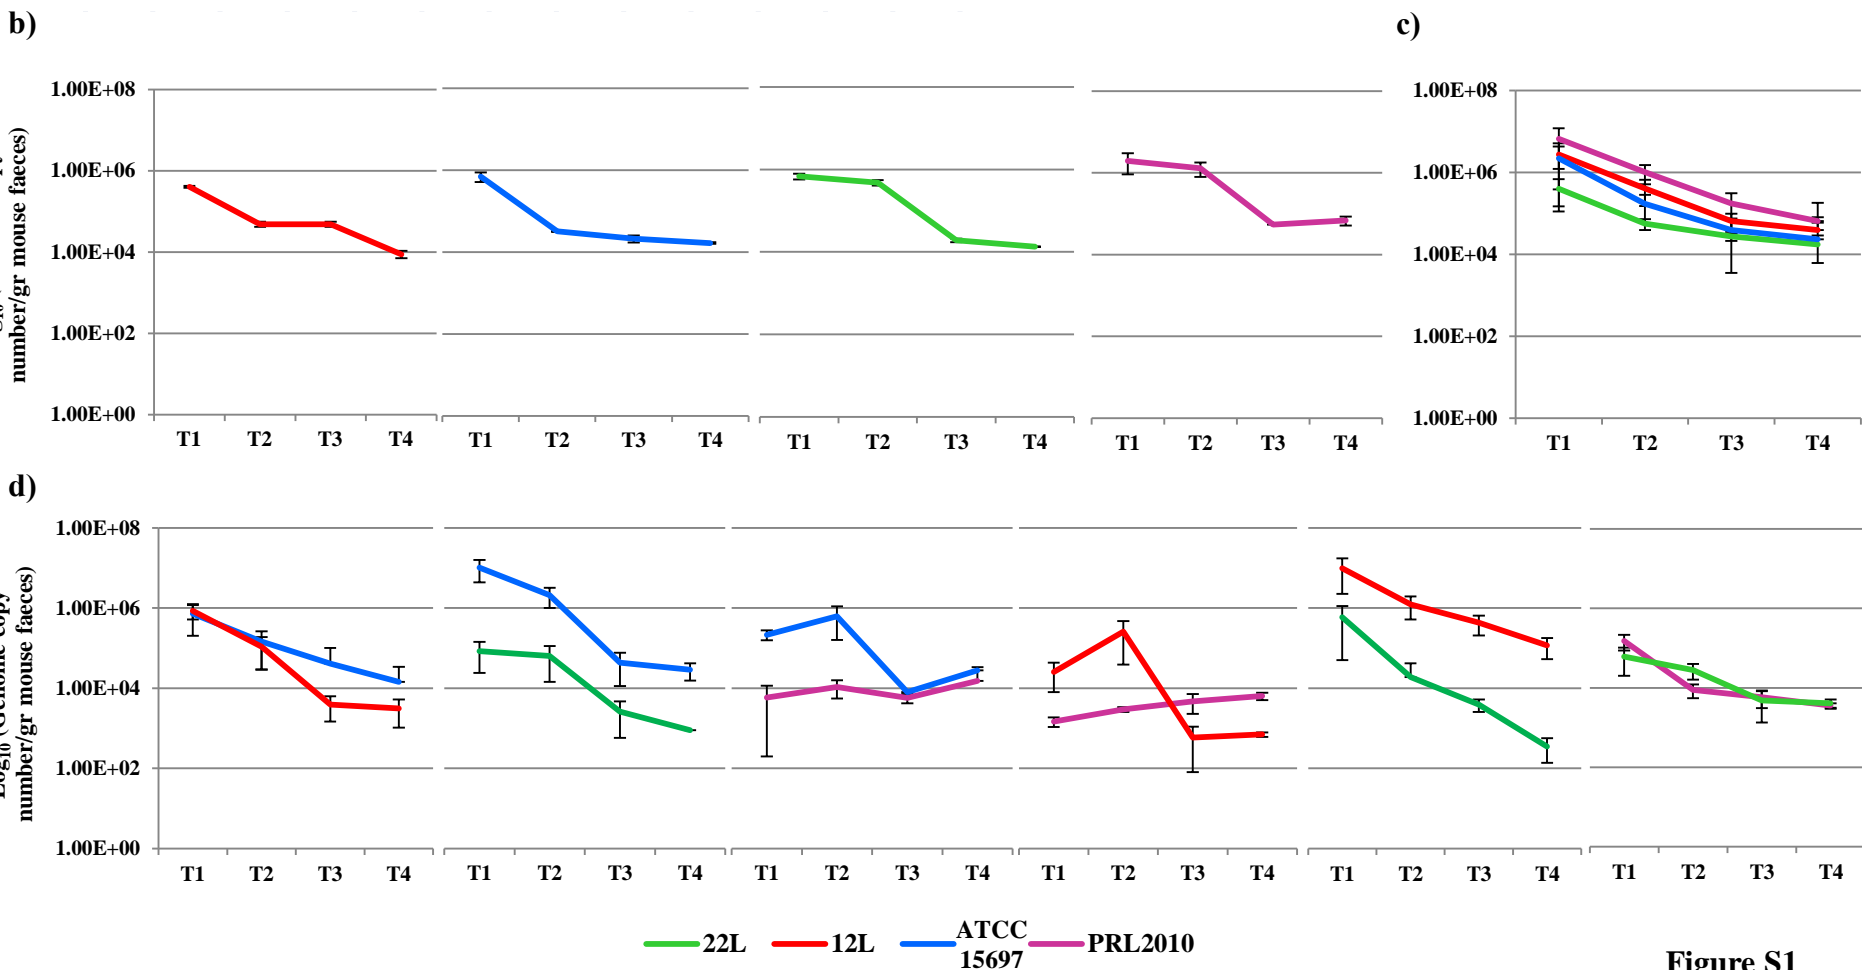

Figure S1

Supplement: ismej2015236x6.pdf [file ismej2015236x6.pdf]

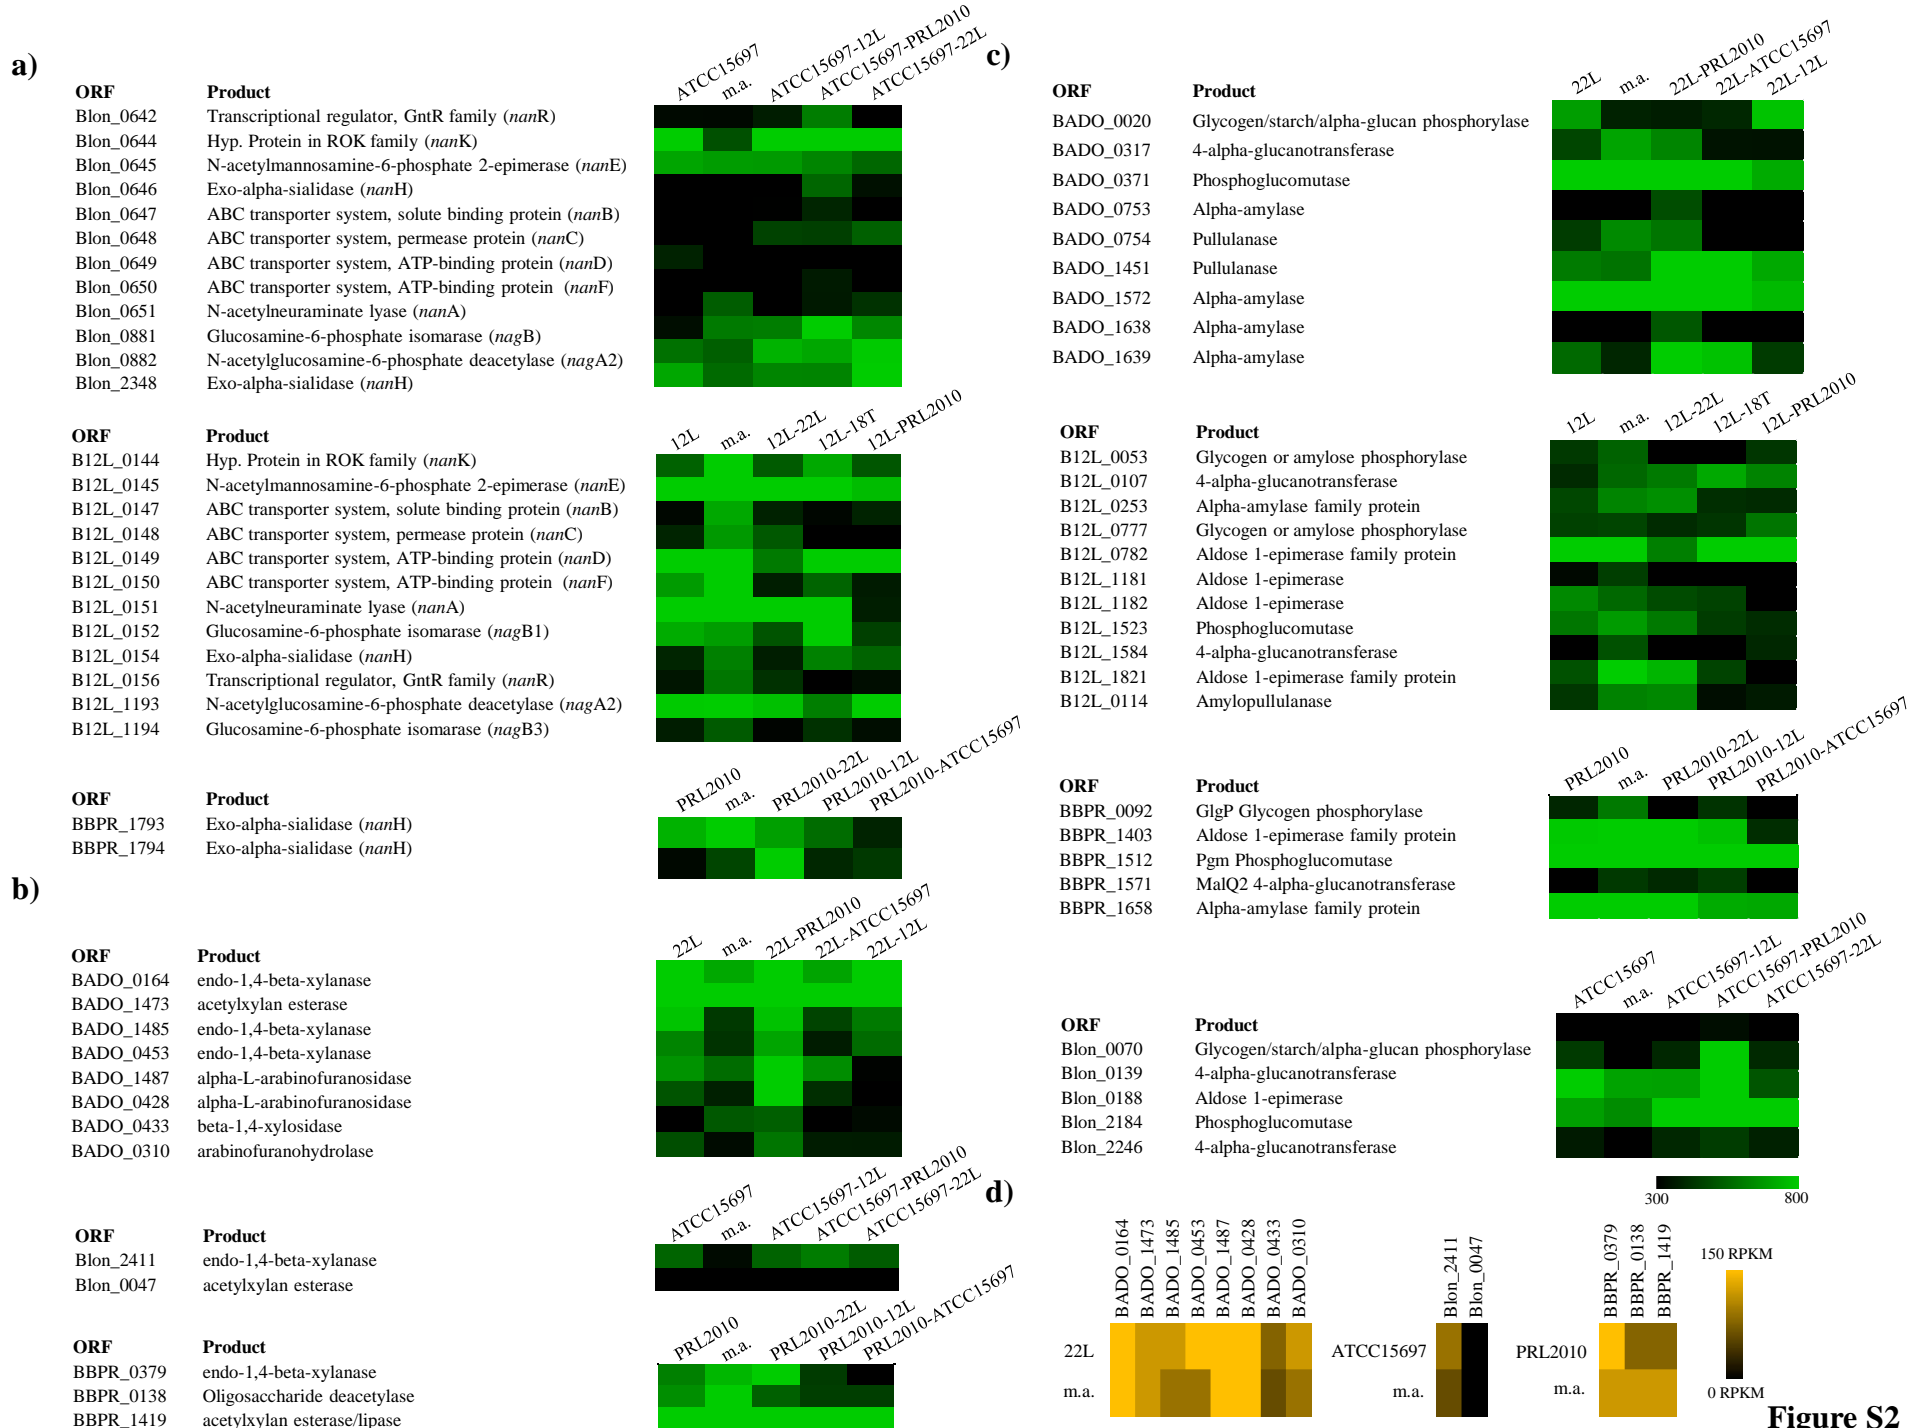

Figure S2

Supplement: ismej2015236x7.pdf [file ismej2015236x7.pdf]

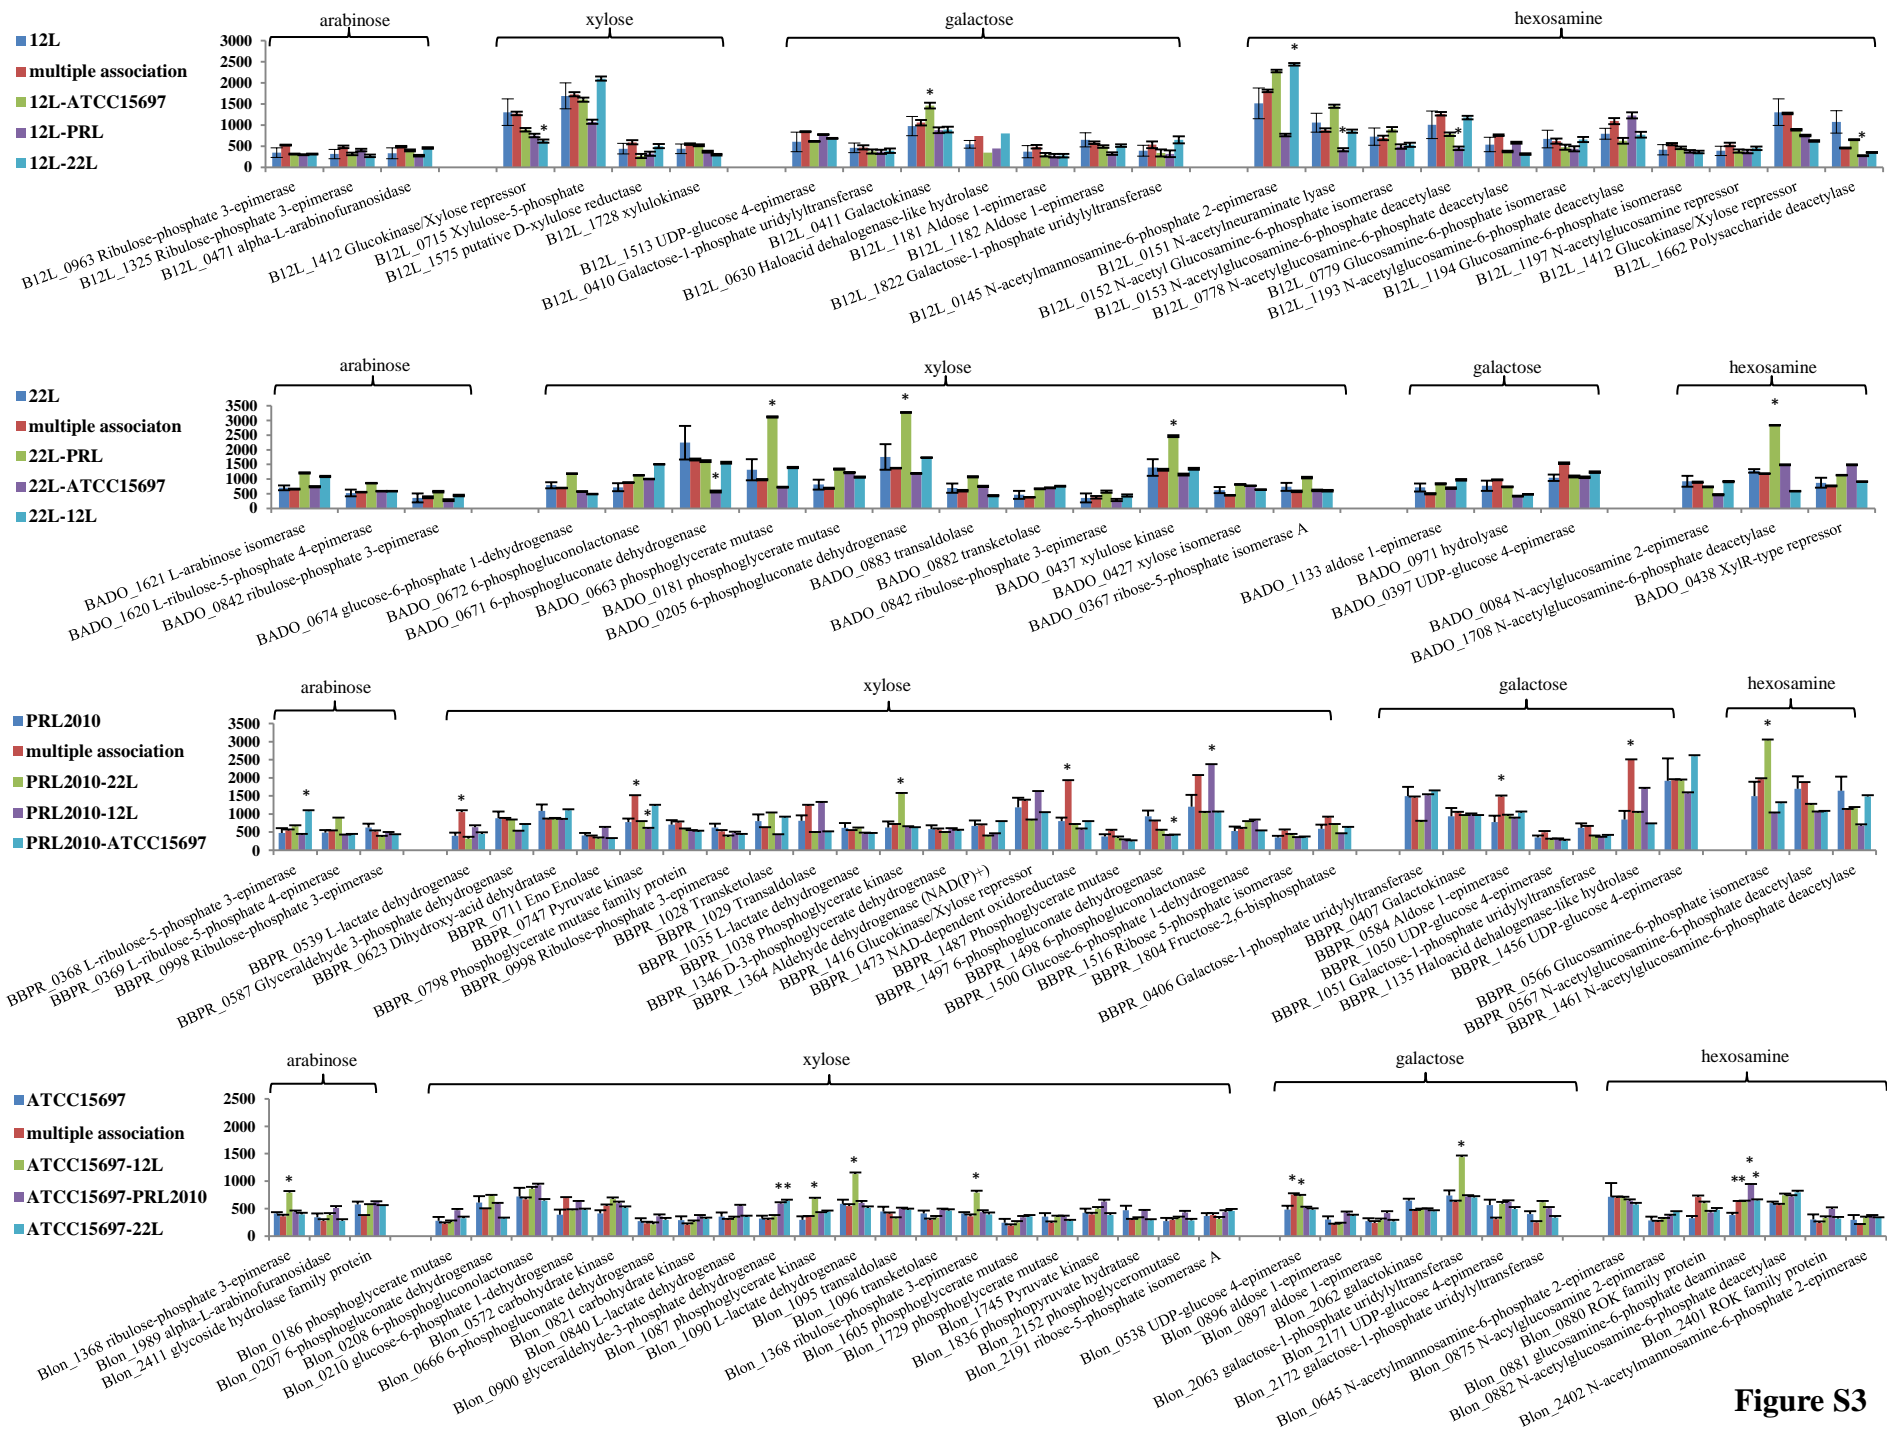

**Figure S3**

Supplement: ismej2015236x8.pdf [file ismej2015236x8.pdf]
